## Review

# The risk of infections associated with rheumatoid arthritis, with its comorbidity and treatment

Joachim Listing<sup>1</sup>, Kerstin Gerhold<sup>1,2</sup> and Angela Zink<sup>1,3</sup>

## Abstract

RA is known to be associated with an increased risk of serious infection. Even more than 50 years ago, observational studies showed a greater than 2-fold increased risk of serious infection in RA. This was reinforced by various subsequent cohort studies. The elevated susceptibility of patients with RA can be explained by the pathobiology of the disease itself, the impact of chronic comorbid conditions, as well as sequelae of immunosuppressive treatment. It has been suggested that premature ageing of the immune system in RA contributes to weakened protection against infectious organisms. In addition, chronic comorbid conditions such as diabetes or chronic lung or kidney disease, disease-related functional disability, as well as lifestyle factors such as smoking, increase the risk in individual patients. For a long time glucocorticoids (GCs) have been used as potent immunosuppressive drugs in RA. There is evidence that they increase the risk of serious infections up to 4-fold in a dose-dependent manner. TNF- $\alpha$  inhibitors increase the serious infection risk up to 2-fold. They have, however, the potential to outweigh their risk when higher GC doses can be tapered down. If patients need higher dosages of GCs in addition to treatment with biologic agents, their risk of infection is substantial. This combination should be used carefully and, if possible, avoided in patients with additional risk factors such as older age or comorbid conditions.

**Key words:** rheumatoid arthritis, serious infections, susceptibility, immunosuppressive drugs, glucocorticoids, TNF- $\alpha$  inhibitors, comorbidity.

## Introduction

Serious infections are a major concern in patients with RA or other inflammatory rheumatic diseases and contribute to an increased overall mortality [1–9]. With the advent of TNF- $\alpha$  inhibitors for the treatment of RA, concerns regarding the infection risk were reinforced due to their specific mode of action, and infections as possible adverse outcomes were observed with greater attention. Therefore nearly all RCTs with TNF- $\alpha$  inhibitors reported incidence rates of serious infections during the double-blinded phases, which had not been the case in the earlier trials of conventional DMARDs. In addition, after licensing of the first TNF- $\alpha$  inhibitors, biologics registers were established

in various European countries with the aim of investigating their long-term safety under real-life conditions [10]. As a result of both developments, we have today a wealth of information on the infection risk of patients treated with biologics as well as with conventional DMARDs.

When considering the infection risk in RA, we have to take into account the interaction of various endogenous and exogenous risk factors: (i) RA itself as a chronic disorder with immunological dysfunctions, (ii) immunocompromising comorbidities, as well as (iii) the use of potent immunomodulatory drugs. It is a methodological challenge to estimate the contribution of each of these risk factors to the overall infection risk in RA patients.

With this in mind, we will briefly review the infection risk reported for RA in the pre-biologic era, followed by a summary of the results of RCTs and observational studies with immunosuppressive drugs such as glucocorticoids (GCs) and TNF inhibitors. Our focus will be on the lessons we can learn from different kinds of studies and how we can transfer their results to individual patients in daily practice, taking into account that treatment is not the only risk factor of infectious complications and that risk profiles of individual patients may change over time. We will therefore

<sup>1</sup>Epidemiology Unit, German Rheumatism Research Centre Berlin, a Leibniz Institute, <sup>2</sup>Clinic of Paediatric Pneumology and Immunology and <sup>3</sup>Department of Rheumatology and Clinical Immunology, Charité University Medicine, Berlin, Germany.

Submitted 13 July 2012; revised version accepted 25 September 2012.

Correspondence to: Joachim Listing, German Rheumatism Research Centre Berlin, Charitéplatz 1, 10117 Berlin, Germany.  
E-mail: Listing@drfz.de

differentiate between the infection risks observed in cohorts of patients and the risk of individual patients and describe what we gain from this differentiation.

## Incidence of infectious diseases in patients with RA

Since the 1950s, observational studies evaluating overall prognosis and mortality in patients with RA have indicated a noticeable risk of infectious diseases developing in these patients [1, 11]. During the early period, RA was difficult to treat, and severe disease courses with persistent systemic inflammation led to joint damage, immobility and complications such as amyloidosis with subsequent renal failure. Later, surgical treatment of damaged joints was observed to be associated with a higher risk of complicating septic arthritis [12–14]. And even without surgical procedures, septicæmia as well as septic arthritis remain as major concerns in patients with inflammatory rheumatic diseases [6, 15–20]. In the following decades of the last century, controlled observational studies found that age-adjusted mortality in RA patients was about 2-fold increased compared with the general population and infectious diseases were one of the three leading causes of premature death in RA cohorts in the USA and in Europe [4, 6, 18, 20]. In a retrospective cohort study of incident RA cases with disease onset between 1955 and 1994, Doran *et al.* [21] found a high rate of infections requiring hospitalizations (9.6 infections/100 person-years) in 609 patients with established RA. This rate was almost 2-fold (hazard ratio 1.9; 95% CI 1.7, 2.1) higher than in 609 age- and sex-matched non-RA controls [21]. As well, Franklin *et al.* [17] showed in a prospective cohort of 2108 unselected patients with inflammatory polyarthritis in Norwich, UK, an increased infection risk of more than two-and-a-half times that of the general population. Similar results were found by Smitten *et al.* [22] for hospitalized infections. Concerning specific pathogens, in a retrospective cohort of RA patients hospitalized between 1963 and 1998, pneumococcal infection was found at more than 2-fold the rate, when compared with a cohort of patients with non-immune-mediated underlying diseases [23].

## Is there higher susceptibility to infections in patients with RA due to alterations in the immune system?

Immunological considerations support a possible link between infection risk and alterations of the immune system in patients with inflammatory rheumatic diseases. Various disturbances of both the innate and adaptive immune system were thought to contribute to the increased infection risk in RA: first, neutropenia is common in RA patients with severe disease courses or under immunosuppressive treatments; increased pathological immune complexes or direct anti-neutrophil antibodies play a pivotal role in mediating the disease-associated phenomenon. Pathological immune complexes may cause functional

impairment, increased margination or enhanced apoptosis of neutrophils; deficits in the number and function of these first-line defence cells at the site of bacterial invasion and growth may be the consequence [24]. Secondly, adaptive cellular immunity is importantly impaired by a constricted TCR repertoire, which is crucial for naïve T lymphocytes to recognize all potential harmless and harmful antigens [25]. In addition, the capacity of clonal expansion of naïve T cells in response to a previously unknown antigen was significantly reduced in RA patients compared with healthy controls [26]. Frequencies of newly generated naïve T cells immigrating from the thymus into the periphery were shown to be age-inappropriately decreased in RA patients [26]. This was one of the first hints that premature ageing of the immune system in immune-mediated diseases such as RA may be responsible for damage to key immune functions, and therefore for weakened protection against infectious diseases [27, 28]. Further, a higher risk of RA patients to severe infections may be caused by specific gene polymorphisms, e.g. in the TRAF1/C5 locus [29], where complement factor 5 plays a well-known role in the innate immunity against infectious agents [30]. These findings suggest an increased susceptibility to infections in RA patients due to disease-related alterations of the immune system.

## The impact of comorbid conditions, clinical status and lifestyle on infection risk

There is undoubtedly an influence of older age [31–33] and specific comorbid conditions on the infection risk in RA and other inflammatory rheumatic diseases. Significantly increased infection risks have been described for patients with chronic obstructive pulmonary disease and other chronic lung diseases [31, 34–38], chronic kidney diseases [31, 37] and diabetes mellitus [37, 38]. A considerable exogenous risk factor for the development of infections is smoking. It is linked to the pathogenesis of RA [39, 40] and at the same time is a risk factor for distinct infectious diseases [41].

Only limited evidence exists regarding the impact of the disease activity on the susceptibility for infections, possibly due to the close association of RA disease activity and (dosage of) immunosuppressive treatment. Au *et al.* [42] found higher rates of hospitalized infections in RA patients with moderate or high disease activity compared with those with low disease activity. Per 0.6 U in DAS28, they observed a significant, 1.3-fold increase in the risk of serious infection. As in the general population, functional limitations of patients with RA are associated with a greater risk of infections. This has been confirmed by several authors [31, 34, 35, 38, 42].

## The impact of GC treatment

GCs are potent immunosuppressive drugs that are widely used in rheumatological care. Their potential to increase the susceptibility to major infections has been described

for several inflammatory rheumatic diseases [31, 43, 44] and is also seen in patients with other non-rheumatic diseases. By contrast, in a meta-analysis of RCTs investigating the efficacy of GCs, Dixon *et al.* [45] did not find higher infection rates in the GC treatment arms [relative risk (RR) 0.97; 95% CI 0.69, 1.39]. However, most of the trials had sample sizes of < 50 per treatment arm. Furthermore, in most of these trials the incidence of serious infections was not an event of interest and therefore was not reported by physicians in a standardized manner.

Reporting of infections ranged from the percentage of patients with influenza or bronchitis to the number of patients with infections that led to withdrawal of MTX. The inconsistent reporting and a marked heterogeneity between the trials prevented Dixon *et al.* [45] from drawing any definite conclusion [45]. Haraoui *et al.* [46] recently re-analysed the data of a large RCT on certolizumab pegol ( $n = 763$ ) vs placebo ( $n = 199$ ). They observed an increased risk of serious infections in patients who received GCs in doses of >5 up to 10 mg/day compared with those receiving no or <5 mg/day in both arms of the trial. A 2.5-fold increase in the incidence of serious infections was found in a review of anakinra RCTs when patients with and without GC use at baseline were compared [47].

This result is supported by a meta-analysis of observational studies. Dixon *et al.* [45] found a significantly increased risk for serious infections in patients treated with GCs, which was also dose dependent. For patients receiving <5 mg/day, the authors estimated an RR of 1.4 (1.2, 1.6), for 5–10 mg/day an RR of 1.9 (95% CI 1.7, 2.2) and for 10–20 mg/day an RR of 3.0 (1.9, 4.7). This dose-dependent increase in the infection risk was also observed in recently performed observational studies in RA [31, 42, 48, 49] that were not included in the meta-analysis of Dixon *et al.* It is further supported by the fact that the association between dosage and infection risk is clearly stronger for GCs the patient received at the time point of infection than for GCs received months or years earlier [50, 51].

## Impact of cytokine inhibitors

TNF- $\alpha$  plays a crucial role in the host defence against bacterial and viral invasions. It mediates recruiting and activation of macrophages and thereby initiates responses of the innate immune system at infection sites. It is particularly essential for immune mechanisms against intracellular pathogens such as mycobacteria. This central immunological function of TNF- $\alpha$  in host defence has raised concerns about an increased risk of serious infections in patients treated with TNF- $\alpha$ -inhibiting agents.

### Results of RCTs

In a meta-analysis of RCT data, Bongartz *et al.* [52] found a significant, 2-fold-increased risk of serious infections in RA patients receiving adalimumab or infliximab. The increase was slightly lower (1.8) when only low dosages were compared with placebo. In contrast to these findings, the meta-analysis of Leombruno *et al.* [53] and those

of others [54, 55], which were performed later and included more RCTs, did not observe a significantly increased infection risk or observed the increase only in verum arms with high, non-recommended dosages of biologics [53]. Taking all results of meta-analyses together, the risk for serious infections in RA corresponds to an odds ratio (OR) of approximately 1.2–1.4 [53, 54] in anti-TNF-treated patients. Similar results were found for abatacept (OR = 1.4), rituximab (OR = 1.5) [55] and tocilizumab (OR = 1.3) [56]. For anakinra, incidence rates of 1.7 and 5.4 serious infections/100 patient-years, respectively, were found in the placebo and verum arms of the RCTs [47].

In order to distinguish the risk of RA patients resulting from chronic comorbidity or older age from the risk conveyed by treatment, comparison with other inflammatory rheumatic diseases with a lower background risk of infection is useful. No increased risk was found for anti-TNF agents in PsA [57], whereas the risk of serious infections in patients with AS was also found to be higher in those treated with TNF- $\alpha$  inhibitors. Compared with RA, these patients are younger, have less comorbidity and are usually not treated with GCs. Therefore their background risk of serious infections is clearly lower. Fouque-Aubert *et al.* [58], in their meta-analysis of trials with AS patients, observed a 1.9-fold RR of serious infection in the anti-TNF arms compared with the placebo arms.

Regarding meta-analyses of RCTs, methodological problems exist that we should be aware of when interpreting their safety results. Patients enrolled in trials are significantly different from those treated in daily care [59]. Only 25–33% of patients treated with cytokine-inhibiting treatment in daily care would fulfil trial inclusion and exclusion criteria [59]. Among the excluded patients are those with a higher susceptibility to serious infections: patients with a history of chronic infections, with severe comorbidities or low functional capacity.

Furthermore, meta-analyses of infrequent or rare events have to deal with the problem of zero events in one treatment arm. Division by zero is not calculable; this leads to incalculable ORs or RR estimates. Usually 0.5 events are added to zero in order to estimate RRs. However, adding 0.25 or 1.0 instead would change the results. Moreover, simulation results suggest that the frequently used Mantel-Haenszel method with a 0.5 zero-cell correction leads to biased results [60].

One important limitation is drawn from a finding described by Leombruno *et al.* [53]. The authors compared the serious infection risk in anti-TNF treatment arms with those of the placebo arms and found a decrease in the OR for serious infections in the verum arms of trials with longer duration. For RCTs with 26, 52 and 104 weeks duration they estimated ORs of 1.83, 1.48 and 0.98, respectively (Fig. 1).

Figure 1 illustrates that we have to consider changes in the infection risks over time not only in observational studies [31], but in RCTs as well. The reasons for these changes are similar in both types of studies: selective drop-out of high-risk patients and changes in clinical

**Fig. 1** Regression of the logarithms of the ORs vs trial duration.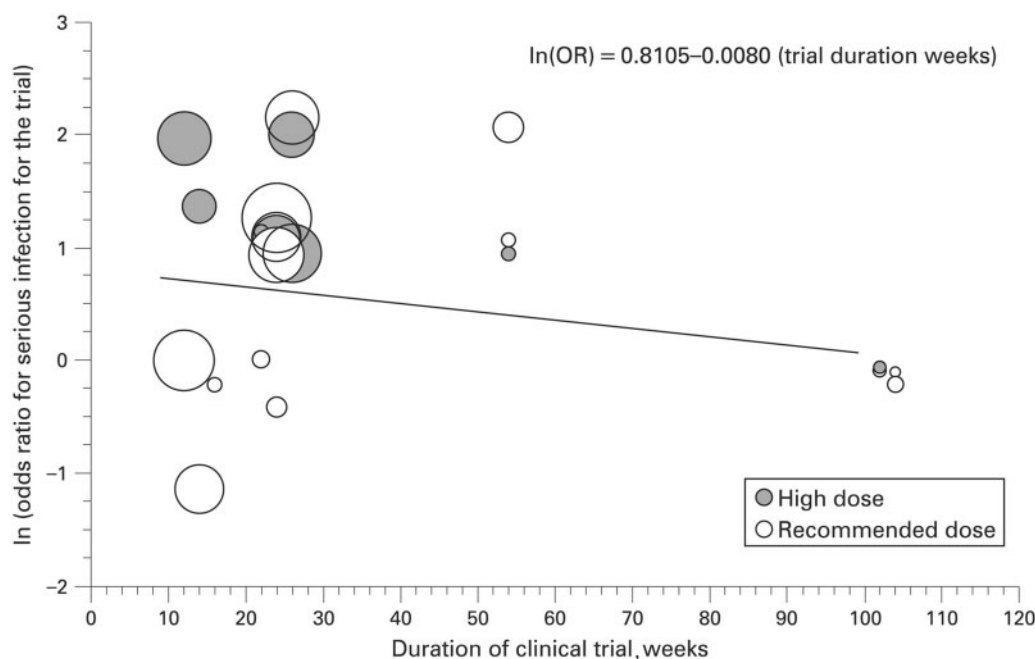

The size of the bubble is proportional in area to the trial's weight in the analysis. The shading of the circle is related to the dose used.  $\beta$ -Coefficient for duration is  $-0.00761/\text{week}$ ,  $P=0.0512$ . Reproduced from Leombruno *et al.* [53] with permission from BMJ Publishing Group Ltd.

status or co-medication. These time-varying risks have implications on the interpretation of study results. Considering this, the results of meta-analyses are an important source to estimate the risk of developing a serious adverse event (e.g. a serious infection) on the group level, in average patients and follow-up time, and presuming an average response to treatment. However, with these risk estimates physicians are not able to assess the risk of a treatment for an individual patient who may differ from the average patient, e.g. by age, comorbid conditions, co-medication with GCs, functional impairment or response to treatment.

#### Results of observational studies

Observational cohort studies on drug treatment observe unselected patients in daily care. They are able to include high numbers of patients and follow them for an undetermined period. Their ability to produce robust estimates on the safety of the drugs under observation and to detect possible safety signals of rare events is therefore superior even to very large RCTs. On the other hand, due to non-randomization, these studies are prone to confounding by indication. Even after careful adjustment, selection bias can never be entirely ruled out. Since observational studies follow the patients over very long time periods, they are also prone to attrition bias, i.e. selective loss to follow-up.

With the licensing of the first TNF- $\alpha$  inhibitors, the Societies for Rheumatology of various European countries took on responsibility for increased pharmaco-vigilance.

Independent drug registries were established in countries such as the UK, Sweden, Germany, Spain, Denmark and others, the majority with support from all pharmaceutical companies producing the agents [10]. Driven by the results from randomized trials and by considerations of the mode of immunological action of these substances, the major concerns pertained to the induction of malignancies, serious infections or autoimmune disease.

Initial results supported the assumption of an increased risk of serious infection from anti-TNF agents by showing a 2-fold increased risk compared with a DMARD control group after adjustment for baseline differences [61]. Subsequently, partly conflicting results were reported ranging from no [34, 62], to a moderately increased [32, 49, 63], to a 2-fold increased risk of serious infections [37]. A 4-fold increased risk was observed within the first 3 to 6 months of treatment with anti-TNF agents [37, 63]. A first explanation for the conflicting results was given by Askling *et al.* [64]. They found a decrease over time in the RR of hospitalization for infection in patients who remained on their first anti-TNF agent. The RR compared with conventional DMARD treatment decreased from 1.43 in the first to 1.15 in the second and 0.82 in the third year of treatment [64]. Further studies reproduced this time-dependent decrease in risk. A common conclusion was that the increased risk of infection was confined to the first 3–6 months of treatment. But the question remained: why?

Methodological considerations included, among others, confounding by indication, which means that patients

treated with cytokine inhibitors in daily care are in general more severely ill than patients receiving conventional DMARDs. This problem was taken into account in most of the studies. Patient characteristics assessed at the start of treatment were used to estimate the likelihood of a patient receiving anti-TNF treatment. This likelihood or propensity score was then used to stratify patients into groups with a similar propensity score. Comparisons between anti-TNF- and DMARD-exposed patients were made within the propensity score strata, i.e. between patients with rather similar risk profiles at baseline.

This approach is able to adjust for differences in patient characteristics at the start of treatment, but has the disadvantage of being static. Changes in risk profiles over time are not considered. Severely affected patients are treated with more potent immunosuppressive drugs to reach the clinical status that other patients have already achieved with less immunosuppressive treatments. Not taking these changes into account may lead to false conclusions.

For example, patients with a history of serious infection have a higher risk of developing further serious infections [31, 48, 65]. Withdrawal from anti-TNF treatment or dropping out of a study because of serious infections therefore leads to the depletion of patients susceptible to infections and to patients with lower risk remaining in the cohort. Since these drop-out processes do not happen at random, they can seriously bias the results [31]. In light of this, the results from Grijalva *et al.* [66], who reported no increased risk under TNF inhibitors based upon claims data, have to be treated with caution since their drop-out rates exceeded 50% in one group within the first 4 months of follow-up. In addition, fluctuating GC dosages or changes in functional capacity, both of which have a significant impact on the development of infections, have to be considered. Therefore adjustment for the GC dose only at baseline is of limited value.

## Tuberculosis and opportunistic infections

Soon after licensing, TNF inhibitors were already described as associated with an increased risk of severe tuberculosis [67, 68]. The cases tended to be unusually severe and to present with extra-pulmonary disease [67]. In the Spanish Society for Rheumatology biologics register, a more than 20-fold increased risk was found for patients treated with TNF inhibitors compared with the general population, and a 7-fold risk compared with an unexposed RA cohort. However, after implementing screening guidelines, this risk decreased to a 4-fold risk compared with the general population and no increased risk compared with other RA patients [69, 70]. The higher risk of reactivation of tuberculosis with TNF inhibitors, in particular the monoclonal antibodies, was confirmed in the Swedish register in 2005 [71] and the British register in 2010 [72]. A few cases of tuberculosis have been reported under abatacept and tocilizumab, and screening

before initiation of therapy is recommended for these substances as well [73].

The British Biologics Register compared the risk of tuberculosis in 10 712 patients treated with infliximab, adalimumab or etanercept. Forty cases of tuberculosis were observed in 34 025 patient-years of follow-up. The risk for etanercept was lowest, with 0.39/1000 patient-years, and higher for the monoclonal antibodies (3.1 times higher for infliximab and 4.2 times higher for adalimumab compared with etanercept) [72].

In the first years after licensing of TNF inhibitors, various case reports and results from spontaneous reporting systems suggested an increased risk of opportunistic infections under TNF inhibition. These reports included infections with *Toxoplasma*, *Listeria*, *Histoplasma*, *Leishmania*, coccidioidomycosis, *Legionella*, candidiasis, *Pneumocystis jirovecii* and aspergillosis (for details see Martin-Mola and Balsa [73] and Strangfeld and Listing [74]). However, these reports mainly originated from endemic areas or were related to severely immunocompromised patients. They indicate that, although not common, risk might be increased in patients receiving cytokine-inhibiting treatment. Measures to minimize the risk follow the general guidelines for immunocompromised persons: avoid non-pasteurized food, observe travel warnings, vaccinate against common infections.

## Infection risk in individual patients

As discussed above, estimates of the risk of serious infections are usually based on averages over patients and follow-up time. They allow a rough estimation of the risk of a treatment in general but are inadequate to assess the risk of individual patients at a certain point in time, e.g. when treatment decisions have to be made.

A first attempt to overcome this limitation and enable the rheumatologist to assess the risk of patients individually based on their current status was made by the German biologics register RABBIT (Rheumatoid Arthritis Observation of Biologic Therapy). In this analysis, time-varying changes in functional status, treatment with TNF inhibitors and GC dosages were considered [31]. Thus patients were considered as being at risk of high dosages of GC only for the time interval they were exposed. If the dosage could be tapered down due to lower disease activity, the actual lower GC dose was taken into account. The analysis resulted in estimates for relative and absolute risks. Compared with treatment with synthetic DMARDs, a nearly 2-fold-increased risk (RR=1.8; 95% CI 1.2, 2.7) of developing serious infections was found for patients treated with TNF inhibitors. Two- (RR=2.1; 95% CI 1.4, 3.2) to more than 4-fold (RR=4.7; 95% CI 2.4, 9.4) increased risks were observed for patients receiving 7.5–14 mg/day and  $\geq 15$  mg/day GCs, respectively. Of note, these risks were constant over the time the patients were exposed to these drugs and allowed the estimation of absolute risks (incidence rates), as shown in Table 1.

For example, an RA patient aged 65 with chronic obstructive pulmonary disease (COPD) has two risk

**TABLE 1** Estimated incidence rates of serious infections per 100 patient-years with 95% CIs in parentheses

| GCs              | Risk factors <sup>a</sup> (95% CI) |                  |                   |                    |
|------------------|------------------------------------|------------------|-------------------|--------------------|
|                  | None                               | One <sup>a</sup> | Two <sup>a</sup>  | Three <sup>b</sup> |
| DMARDs           |                                    |                  |                   |                    |
| 0 to <7.5 mg/day | 0.9 (0.6, 1.4)                     | 1.5 (1.0, 2.2)   | 2.5 (1.5, 4.2)    | 5.3 (2.5, 11.4)    |
| 7.5–14 mg/day    | 2.0 (1.2, 3.2)                     | 3.2 (1.9, 5.3)   | 5.4 (3.1, 9.3)    | 11.4 (5.8, 22.6)   |
| ≥15 mg/day       | 4.4 (2.1, 9.2)                     | 7.1 (3.3, 15.4)  | 12.0 (5.8, 24.8)  | 25.4 (10.8, 59.4)  |
| TNF inhibitors   |                                    |                  |                   |                    |
| 0 to <7.5 mg/day | 1.7 (1.2, 2.3)                     | 2.7 (2.0, 3.7)   | 4.6 (3.0, 7.1)    | 9.7 (4.5, 20.8)    |
| 7.5–14 mg/day    | 3.6 (2.3, 5.6)                     | 5.8 (3.6, 9.4)   | 9.8 (5.8, 16.3)   | 20.7 (10.0, 42.8)  |
| ≥15 mg/day       | 8.0 (3.9, 16.4)                    | 12.9 (6.0, 27.7) | 21.7 (10.7, 44.3) | 45.9 (18.9, 111.7) |

<sup>a</sup>One or two of the following risk factors: age >60 years, chronic lung disease, chronic renal disease or high number of treatment failures. Considering a history of serious infections as a risk factor would have led to ~30% higher incidence rates. <sup>b</sup>Two risk factors (see above) plus history of serious infections. Adapted from Strangfeld *et al.* [31] with permission from BMJ Publishing Group Ltd.

factors (older age and COPD) in addition to RA. Assuming this patient is treated with MTX and 7.5 mg/day GCs, in 100 patients with such a risk profile, 5.4 serious infections are expected to be observed per year. In the case that the treatment of this patient is insufficient and the GC dose has to be increased to 15 mg/day, the expected rate would be 12 serious infections/100 patient-years (Table 1). Switching to a TNF inhibitor instead would increase the risk to 10 infections/100 patient-years, but if the new treatment is effective and the GC dose can be tapered down to <7.5 mg/day, the expected rate is only 4.6/100 patient-years. This example describes the impact of different treatment options for individual patients, as well as explaining how anti-TNF agents may influence the infection risk at the level of the individual patient. The RABBIT risk score was recently validated on a new patient cohort of 1327 RA patients treated with TNF- $\alpha$  inhibitors and of 1276 patients treated with synthetic DMARDs. A high agreement between expected and observed infections was found [75]. Crowson *et al.* [48] developed a similar risk score based on data of 609 patients of the Rochester cohort, which does not, however, include treatment with biologic agents.

Summary

Patients with RA have elevated susceptibility to serious infections due to features of the disease itself, comorbidity and immunosuppressive treatment. GCs increase the risk by a factor of two to four in a dose-dependent manner. TNF- $\alpha$  inhibitors increase the serious infection risk up to 2-fold. Meta-analyses suggest a similar increase for non-anti TNF biologics.

Biologics have the potential to outweigh their risk when higher GC doses can be tapered down. However, if patients need higher dosages of GCs despite treatment with biologic agents, their risk of infection is substantial. This combination has to be used carefully and, if possible, avoided in patients with additional risk factors such as older age or comorbid conditions.

**Rheumatology key messages**

- Active RA is associated with an increased risk of serious infection.
- GCs and biologic agents increase the susceptibility for serious infections in patients with RA.
- The evidence from observational studies allows estimation of infection risks in individual RA patients.

*Disclosure statement:* J.L., K.G. and A.Z. have all received joint unconditional research funds for the German biologics register RABBIT from Abbott, Amgen/Biovitrum, BMS, Merck, Roche, Pfizer and UCB.

References

- 1 Cobb S, Anderson F, Bauer W. Length of life and cause of death in rheumatoid arthritis. *N Engl J Med* 1953;249: 553–6.
- 2 Souza DC, Santo AH, Sato EI. Mortality profile related to systemic lupus erythematosus: a multiple cause-of-death analysis. *J Rheumatol* 2012;39:496–503.
- 3 Bjornadal L, Baecklund E, Yin L, Granath F, Klareskog L, Ekbom A. Decreasing mortality in patients with rheumatoid arthritis: results from a large population based cohort in Sweden, 1964–95. *J Rheumatol* 2002;29:906–12.
- 4 Wolfe F, Mitchell DM, Sibley JT *et al.* The mortality of rheumatoid arthritis. *Arthritis Rheum* 1994;37:481–94.
- 5 Prior P, Symmons DP, Scott DL, Brown R, Hawkins CF. Cause of death in rheumatoid arthritis. *Br J Rheumatol* 1984;23:92–9.
- 6 Perez-Sola MJ, Torre-Cisneros J, Perez-Zafrilla B, Carmona L, Descalzo MA, Gomez-Reino JJ. Infections in patients treated with tumor necrosis factor antagonists: incidence, etiology and mortality in the BIOBADASER registry. *Med Clin* 2011;137:533–40.
- 7 Rosner S, Ginzler EM, Diamond HS *et al.* A multicenter study of outcome in systemic lupus erythematosus. II. Causes of death. *Arthritis Rheum* 1982;25:612–7.

- 8 Wall N, Harper L. Complications of long-term therapy for ANCA-associated systemic vasculitis. *Nat Rev Nephrol* 2012;8:523–32.
- 9 Zandman-Goddard G, Shoenfeld Y. Infections and SLE. *Autoimmunity* 2005;38:473–85.
- 10 Zink A, Askling J, Dixon WG, Klareskog L, Silman AJ, Symmons DP. European biologicals registers: methodology, selected results and perspectives. *Ann Rheum Dis* 2009;68:1240–6.
- 11 Uddin J, Kraus AS, Kelly HG. Survivorship and death in rheumatoid arthritis. *Arthritis Rheum* 1970;13:125–30.
- 12 Arden GP, Harrison SH, Ansell BM. Rheumatoid arthritis. Surgical treatment. *Br Med J* 1970;4:604–9.
- 13 Rimoin DL, Wennberg JE. Acute septic arthritis complicating chronic rheumatoid arthritis. *JAMA* 1966;196:617–21.
- 14 Goldenberg DL. Infectious arthritis complicating rheumatoid arthritis and other chronic rheumatic disorders. *Arthritis Rheum* 1989;32:496–502.
- 15 Reilly PA, Cosh JA, Maddison PJ, Rasker JJ, Silman AJ. Mortality and survival in rheumatoid arthritis: a 25 year prospective study of 100 patients. *Ann Rheum Dis* 1990;49:363–9.
- 16 Doran MF, Crowson CS, Pond GR, O'Fallon WM, Gabriel SE. Predictors of infection in rheumatoid arthritis. *Arthritis Rheum* 2002;46:2294–300.
- 17 Franklin J, Lunt M, Bunn D, Symmons D, Silman A. Risk and predictors of infection leading to hospitalisation in a large primary-care-derived cohort of patients with inflammatory polyarthritis. *Ann Rheum Dis* 2007;66:308–12.
- 18 Mutru O, Laakso M, Isomaki H, Koota K. Ten year mortality and causes of death in patients with rheumatoid arthritis. *Br Med J (Clin Res Ed)* 1985;290:1797–9.
- 19 Myllykangas-Luosujarvi R, Aho K, Kautiainen H, Isomaki H. Shortening of life span and causes of excess mortality in a population-based series of subjects with rheumatoid arthritis. *Clin Exp Rheumatol* 1995;13:149–53.
- 20 Mikuls TR, Saag KG, Criswell LA *et al*. Mortality risk associated with rheumatoid arthritis in a prospective cohort of older women: results from the Iowa Women's Health Study. *Ann Rheum Dis* 2002;61:994–9.
- 21 Doran MF, Crowson CS, Pond GR, O'Fallon WM, Gabriel SE. Frequency of infection in patients with rheumatoid arthritis compared with controls—a population-based study. *Arthritis Rheum* 2002;46:2287–93.
- 22 Smitten AL, Choi HK, Hochberg MC *et al*. The risk of hospitalized infection in patients with rheumatoid arthritis. *J Rheumatol* 2008;35:387–93.
- 23 Wotton CJ, Goldacre MJ. Risk of invasive pneumococcal disease in people admitted to hospital with selected immune-mediated diseases: record linkage cohort analyses. *J Epidemiol Community Health* 2012 Apr 6. [Epub ahead of print] DOI: 10.1136/jech-2011-200168.
- 24 Starkebaum G. Chronic neutropenia associated with autoimmune disease. *Semin Hematol* 2002;39:121–7.
- 25 Wagner UG, Koetz K, Weyand CM, Goronzy JJ. Perturbation of the T cell repertoire in rheumatoid arthritis. *Proc Natl Acad Sci USA* 1998;95:14447–52.
- 26 Koetz K, Bryl E, Spickschen K, O'Fallon WM, Goronzy JJ, Weyand CM. T cell homeostasis in patients with rheumatoid arthritis. *Proc Natl Acad Sci USA* 2000;97:9203–8.
- 27 Andrews NP, Fujii H, Goronzy JJ, Weyand CM. Telomeres and immunological diseases of aging. *Gerontology* 2010;56:390–403.
- 28 Hohensinner PJ, Goronzy JJ, Weyand CM. Telomere dysfunction, autoimmunity and aging. *Aging Dis* 2011;2:524–37.
- 29 Panoulas VF, Smith JP, Nightingale P, Kitas GD. Association of the TRAF1/C5 locus with increased mortality, particularly from malignancy or sepsis, in patients with rheumatoid arthritis. *Arthritis Rheum* 2009;60:39–46.
- 30 Haeney MR. The role of the complement cascade in sepsis. *J Antimicrob Chemother* 1998;41(Suppl. A):41–6.
- 31 Strangfeld A, Eveslage M, Schneider M *et al*. Treatment benefit or survival of the fittest: what drives the time-dependent decrease in serious infection rates under TNF inhibition and what does this imply for the individual patient? *Ann Rheum Dis* 2011;70:1914–20.
- 32 Galloway JB, Hyrich KL, Mercer LK *et al*. Anti-TNF therapy is associated with an increased risk of serious infections in patients with rheumatoid arthritis especially in the first 6 months of treatment: updated results from the British Society for Rheumatology Biologics Register with special emphasis on risks in the elderly. *Rheumatology* 2010;50:124–31.
- 33 Laube S. Skin infections and ageing. *Ageing Res Rev* 2004;3:69–89.
- 34 Dixon WG, Watson K, Lunt M, Hyrich KL, Silman AJ, Symmons DP. Rates of serious infection, including site-specific and bacterial intracellular infection, in rheumatoid arthritis patients receiving anti-tumor necrosis factor therapy: results from the British Society for Rheumatology Biologics Register. *Arthritis Rheum* 2006;54:2368–76.
- 35 Wolfe F, Caplan L, Michaud K. Treatment for rheumatoid arthritis and the risk of hospitalization for pneumonia: associations with prednisone, disease-modifying antirheumatic drugs, and anti-tumor necrosis factor therapy. *Arthritis Rheum* 2006;54:628–34.
- 36 Gottenberg JE, Ravaud P, Bardin T *et al*. Risk factors for severe infections in patients with rheumatoid arthritis treated with rituximab in the autoimmunity and rituximab registry. *Arthritis Rheum* 2010;62:2625–32.
- 37 Curtis JR, Patkar N, Xie A *et al*. Risk of serious bacterial infections among rheumatoid arthritis patients exposed to tumor necrosis factor alpha antagonists. *Arthritis Rheum* 2007;56:1125–33.
- 38 Greenberg JD, Reed G, Kremer JM *et al*. Association of methotrexate and tumour necrosis factor antagonists with risk of infectious outcomes including opportunistic infections in the CORRONA registry. *Ann Rheum Dis* 2010;69:380–6.
- 39 Symmons DP, Bankhead CR, Harrison BJ *et al*. Blood transfusion, smoking, and obesity as risk factors for the development of rheumatoid arthritis: results from a primary care-based incident case-control study in Norfolk, England. *Arthritis Rheum* 1997;40:1955–61.

- 40 Klareskog L, Stolt P, Lundberg K *et al.* A new model for an etiology of rheumatoid arthritis: smoking may trigger HLA-DR (shared epitope)-restricted immune reactions to autoantigens modified by citrullination. *Arthritis Rheum* 2006;54:38–46.
- 41 Stampfli MR, Anderson GP. How cigarette smoke skews immune responses to promote infection, lung disease and cancer. *Nat Rev Immunol* 2009;9:377–84.
- 42 Au K, Reed G, Curtis JR *et al.* High disease activity is associated with an increased risk of infection in patients with rheumatoid arthritis. *Ann Rheum Dis* 2011;70:785–91.
- 43 Bernatsky S, Hudson M, Suissa S. Anti-rheumatic drug use and risk of serious infections in rheumatoid arthritis. *Rheumatology* 2007;46:1157–60.
- 44 Ruiz-Irastorza G, Danza A, Khamashta M. Glucocorticoid use and abuse in SLE. *Rheumatology* 2012;51:1145–53.
- 45 Dixon WG, Suissa S, Hudson M. The association between systemic glucocorticoid therapy and the risk of infection in patients with rheumatoid arthritis: systematic review and meta-analyses. *Arthritis Res Ther* 2011;13:R139.
- 46 Haraoui B, Combe B, Champsaur M, Luijckens K, Keystone E. Effects of different steroid doses on adverse events and radiographic progression of certolizumab pegol treated rheumatoid arthritis. *Ann Rheum Dis* 2012; 71(Suppl. 3):498.
- 47 Fleischmann RM, Tesser J, Schiff MH *et al.* Safety of extended treatment with anakinra in patients with rheumatoid arthritis. *Ann Rheum Dis* 2006;65:1006–12.
- 48 Crowson CS, Hoganson DD, Fitz-Gibbon PD, Matteson EL. Development and validation of a risk score for serious infections in patients with rheumatoid arthritis. *Arthritis Rheum* 2012;64:2847–55.
- 49 Lane MA, McDonald JR, Zeringue AL *et al.* TNF-alpha antagonist use and risk of hospitalization for infection in a national cohort of veterans with rheumatoid arthritis. *Medicine* 2011;90:139–45.
- 50 Ruiz-Irastorza G, Olivares N, Ruiz-Arzuza I, Martinez-Berriotxo A, Egurbide MV, Aguirre C. Predictors of major infections in systemic lupus erythematosus. *Arthritis Res Ther* 2009;11:R109.
- 51 Dixon WG, Abrahamowicz M, Beauchamp ME *et al.* Immediate and delayed impact of oral glucocorticoid therapy on risk of serious infection in older patients with rheumatoid arthritis: a nested case-control analysis. *Ann Rheum Dis* 2012;71:1128–33.
- 52 Bongartz T, Sutton AJ, Sweeting MJ, Buchan I, Matteson EL, Montori V. Anti-TNF antibody therapy in rheumatoid arthritis and the risk of serious infections and malignancies: systematic review and meta-analysis of rare harmful effects in randomized controlled trials. *JAMA* 2006;295:2275–85.
- 53 Leombruno JP, Einarson TR, Keystone EC. The safety of anti-tumour necrosis factor treatments in rheumatoid arthritis: meta and exposure-adjusted pooled analyses of serious adverse events. *Ann Rheum Dis* 2009;68:1136–45.
- 54 Thompson AE, Rieder SW, Pope JE. Tumor necrosis factor therapy and the risk of serious infection and malignancy in patients with early rheumatoid arthritis: a meta-analysis of randomized controlled trials. *Arthritis Rheum* 2011;63:1479–85.
- 55 Salliot C, Dougados M, Gossec L. Risk of serious infections during rituximab, abatacept and anakinra treatments for rheumatoid arthritis: meta-analyses of randomised placebo-controlled trials. *Ann Rheum Dis* 2009; 68:25–32.
- 56 Campbell L, Chen C, Bhagat SS, Parker RA, Ostor AJ. Risk of adverse events including serious infections in rheumatoid arthritis patients treated with tocilizumab: a systematic literature review and meta-analysis of randomized controlled trials. *Rheumatology* 2011;50: 552–62.
- 57 Dommasch ED, Abuabara K, Shin DB, Nguyen J, Troxel AB, Gelfand JM. The risk of infection and malignancy with tumor necrosis factor antagonists in adults with psoriatic disease: a systematic review and meta-analysis of randomized controlled trials. *J Am Acad Dermatol* 2011;64:1035–50.
- 58 Fouque-Aubert A, Jette-Paulin L, Combescure C, Basch A, Tebib J, Gossec L. Serious infections in patients with ankylosing spondylitis with and without TNF blockers: a systematic review and meta-analysis of randomized placebo-controlled trials. *Ann Rheum Dis* 2010;69:1756–61.
- 59 Zink A, Strangfeld A, Schneider M *et al.* Effectiveness of tumor necrosis factor inhibitors in rheumatoid arthritis in an observational cohort study: comparison of patients according to their eligibility for major randomized clinical trials. *Arthritis Rheum* 2006;54:3399–407.
- 60 Bradburn MJ, Deeks JJ, Berlin JA, Russell LA. Much ado about nothing: a comparison of the performance of meta-analytical methods with rare events. *Stat Med* 2007; 26:53–77.
- 61 Listing J, Strangfeld A, Kary S *et al.* Infections in patients with rheumatoid arthritis treated with biologic agents. *Arthritis Rheum* 2005;52:3403–12.
- 62 Schneeweiss S, Setoguchi S, Weinblatt ME *et al.* Anti-tumor necrosis factor alpha therapy and the risk of serious bacterial infections in elderly patients with rheumatoid arthritis. *Arthritis Rheum* 2007;56:1754–64.
- 63 Dixon WG, Symmons DP, Lunt M, Watson KD, Hyrich KL, Silman AJ. Serious infection following anti-tumor necrosis factor alpha therapy in patients with rheumatoid arthritis: lessons from interpreting data from observational studies. *Arthritis Rheum* 2007;56:2896–904.
- 64 Askling J, For  d CM, Brandt L *et al.* Time-dependent increase in risk of hospitalisation with infection among Swedish RA-patients treated with TNF antagonists. *Ann Rheum Dis* 2007;66:1339–44.
- 65 Galloway JB, Hyrich KL, Mercer LK *et al.* Risk of septic arthritis in patients with rheumatoid arthritis and the effect of anti-TNF therapy: results from the British Society for Rheumatology Biologics Register. *Ann Rheum Dis* 2011; 70:1810–4.
- 66 Grijalva CG, Chen L, Delzell E *et al.* Initiation of tumor necrosis factor-alpha antagonists and the risk of hospitalization for infection in patients with autoimmune diseases. *JAMA* 2011;306:2331–9.
- 67 Keane J, Gershon S, Wise RP *et al.* Tuberculosis associated with infliximab, a tumor necrosis factor alpha-neutralizing agent. *N Engl J Med* 2001;345:1098–104.
- 68 Mohan AK, Cote TR, Block JA, Manadan AM, Siegel JN, Braun MM. Tuberculosis following the use of etanercept,

- a tumor necrosis factor inhibitor. Clin Infect Dis 2004;39: 295–9.
- 69 Carmona L, Hernandez-Garcia C, Vadillo C *et al*. Increased risk of tuberculosis in patients with rheumatoid arthritis. J Rheumatol 2003;30:1436–9.
- 70 Gomez-Reino JJ, Carmona L, Valverde VR, Mola EM, Montero MD. Treatment of rheumatoid arthritis with tumor necrosis factor inhibitors may predispose to significant increase in tuberculosis risk: a multicenter active-surveillance report. Arthritis Rheum 2003;48:2122–7.
- 71 Askling J, Forde CM, Brandt L *et al*. Risk and case characteristics of tuberculosis in rheumatoid arthritis associated with tumor necrosis factor antagonists in Sweden. Arthritis Rheum 2005;52:1986–92.
- 72 Dixon WG, Hyrich KL, Watson KD *et al*. Drug-specific risk of tuberculosis in patients with rheumatoid arthritis treated with anti-TNF therapy: results from the British Society for Rheumatology Biologics Register (BSRBR). Ann Rheum Dis 2010;69:522–8.
- 73 Martin-Mola E, Balsa A. Infectious complications of biologic agents. Rheum Dis Clin North Am 2009;35:183–99.
- 74 Strangfeld A, Listing J. Bacterial and opportunistic infections during anti-TNF therapy. Best Pract Res Clin Rheumatol 2006;20:1181–95.
- 75 Strangfeld A, Manger B, Elsterhuis C, Krause A, Listing J, Zink A. Validation of the RABBIT risk score for serious infections. EULAR, Annual Congress 2012, Abstract OP0144.
